# Supplementary material for: Seasonal Effect of Grass Nutritional Value on Enteric Methane Emission in Islands Pasture Systems
Source: MDPI journal article supplement (doi:10.3390/ani13172766), 2023-08-30
Supplement: s1 [file s1]

**Table S1** - Productive characteristics of the animals under study

| Category            |                   | BW (Kg) | Milk<br>Production<br>(Kg/day) | Annual<br>Milk<br>Production<br>(Kg/head) | % Milk Fat | Average Daily Gain (Kg/day) |
|---------------------|-------------------|---------|--------------------------------|-------------------------------------------|------------|-----------------------------|
| Dairy cattle        | Beef Calves       | 200     | n.a                            | n.a                                       | n.a        | 0,8                         |
|                     | Calves Dairy Male | 175     | n.a                            | n.a                                       | n.a        | 0,6                         |
|                     | Calves Female     | 175     | n.a                            | n.a                                       | n.a        | 0,6                         |
|                     | Pregnant          | 550     | 24                             | 7320                                      | 3,6        | n.a                         |
|                     | Non-pregnant      | 450     | 18                             | 5490                                      | 3,6        | n.a                         |
| Beef cattle         | Pregnant          | 580     | 5,8                            | 1769                                      | 3,8        | n.a                         |
|                     | Non-pregnant      | 540     | 4,5                            | 1372,5                                    | 3,8        | n.a                         |
| Replacement heifers |                   | 400     | n.a                            | n.a                                       | n.a        | 0,6                         |
| Other bovines       |                   | 550     | n.a                            | n.a                                       | n.a        | 1,2                         |
| Breeding bulls      |                   | 700     | n.a                            | n.a                                       | n.a        | 0                           |

n.a – not applicable.
